# Supplementary material
Source: PubMed Central journal article supplement (PMC10528117)
Supplement: NIHMS1916151-supplement-Supinfo.pdf [file NIHMS1916151-supplement-Supinfo.pdf]

**SUPPLEMENTARY FIGURES AND TABLES.**

**Figure S1. Quantifications of pull-downs in Fig. 1 based on three independent replicates. (A) *in vivo* Strep-BamA pull-down, and (B) *in vitro* His-BamA pull-down.** Graphs represent the quantification of corresponding bands normalized to the level of the bait protein, BamA, and additionally compared to that of the *bamE(WT)* strain in (A). Graphs represent mean +/- SD. Statistical analysis was performed by using one-way ANOVA in comparison with the WT control. n.s. =  $P \geq 0.05$ , \*\* $P < 0.01$ , \*\*\*\* $P < 0.0001$ . N/A stands for “not applicable”.

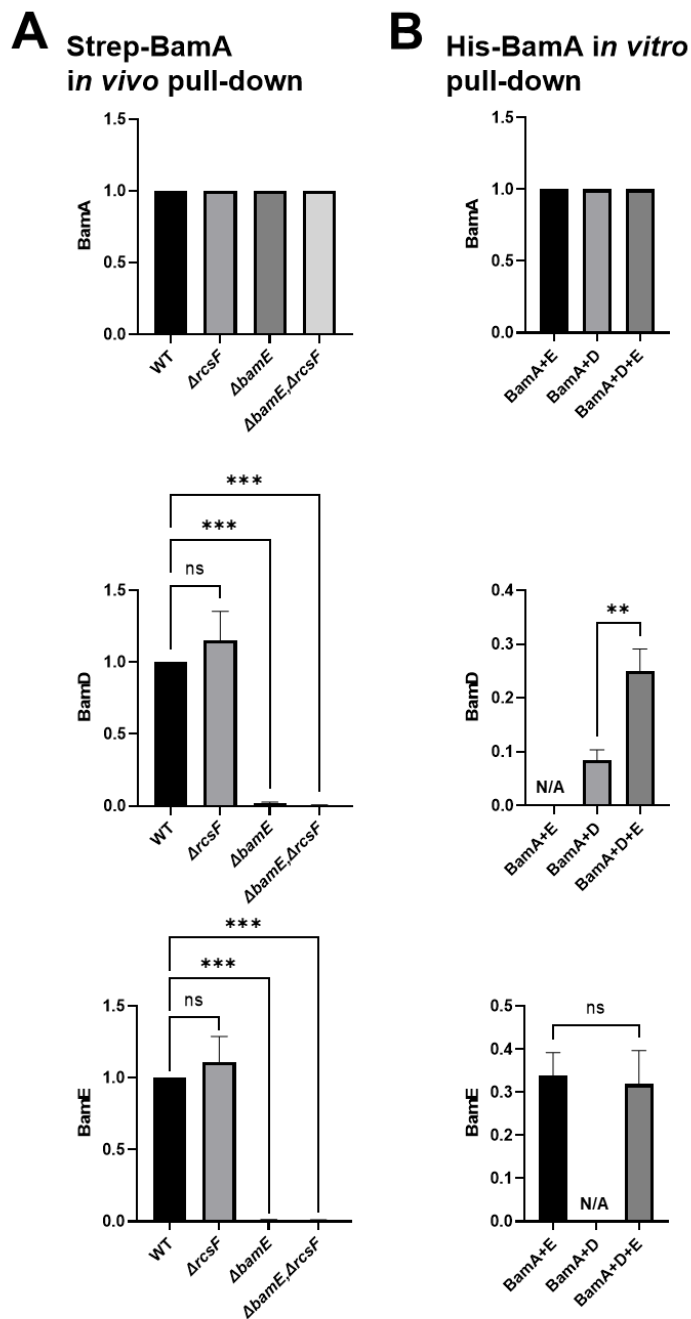

**Figure S2. Structural prediction of BamE/BamA and BamE/BamD complexes from representative species of  $\alpha$ -,  $\beta$ -,  $\gamma$ -Proteobacteria compared to *E. coli*.** Protein sequences of mature (devoid of their signal sequences) BamE, BamA, and BamD were analyzed using ColabFold (MMseqs2 with AlphaFold2-multimer)(Mirdita *et al.*, 2022). The interaction interface based on the top-scoring models is shown. The residues establishing polar contacts were identified using the PDBePISA(Krissinel & Henrick, 2007), and are listed in Table S1 and S2. The protein sequence alignment is shown in Fig.S3. Predicted structures are shown in comparison to the published structures of the *E. coli* Bam complex (PDB: 5ekq (Bakelar *et al.*, 2016) and 5d0o (Gu *et al.*, 2016)).

### BamE-BamA interface

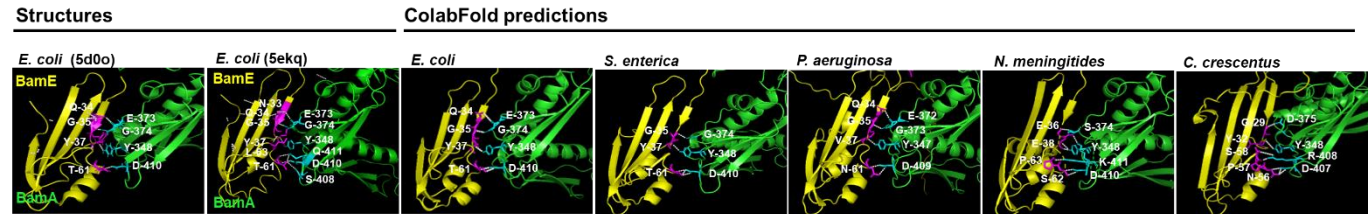

### BamE-BamD interface

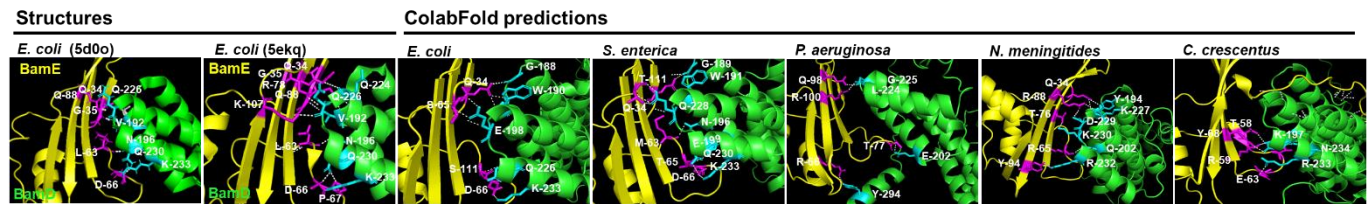

**Figure S3 Multiple sequence alignment of protein sequences used for ColabFold protein complex modeling generated using Clustal Omega. Only BamA POTRA 5 domain is shown for clarity because it is the site for BamD and BamE interaction. Interacting residues that are discussed in this study are highlighted.**

**BamE:**

|                |                                                               |            |     |
|----------------|---------------------------------------------------------------|------------|-----|
|                |                                                               | <b>Y37</b> |     |
| E.coli         | -----MRCKTLTAAAVLLMLTAGCSTLE---RVVYRPDINQGNVLTANDVSKIRVGM     |            | 50  |
| S.enterica     | -----MRCKTLTAAAVLLMLTAGCSTLE---RVVYRPDINQGNVLTPTDVAKVRVGM     |            | 50  |
| P.aeruginosa   | MQNAKLMLTCLAFAG-----LAALAGCSF-----PGVYKIDIQQGNVVTQDMIDQLRPGM  |            | 50  |
| N.meningitidis | -MNKTLILALS-----ALLGLAACSAERVSFLFPSYKLLKIIQGNLEPRVAALRPGM     |            | 51  |
| C.crescentus   | -MKRRV-----SLTILIAACAIGASACNPVLR--HGVRVTTQDVPEIIVAED          |            | 45  |
|                | *.*:                                                          | :          | :   |
|                | <b>D66</b>                                                    |            |     |
| E.coli         | TQQQVAYALGTPLMSPFGTNTWFYVFRQPPGH-----EGVTQQTTLTLTFNSSGVLTNID  |            | 105 |
| S.enterica     | TQQQVAYALGTPMMDPFGTNTWFYVFRQPPGH-----ENVTQQTTLTLTFNSSGVLTNID  |            | 105 |
| P.aeruginosa   | TRRQVRFIMGNPLIVDTFHANRWDYLYSIQPGG-----GRRQQQERVSLFFNDSQLAGLN  |            | 105 |
| N.meningitidis | TKDQVLLLLGSPILRDAFHTDRWDYTFNTSRNG-----I IKERSNLTVYFEN-GVLVRTE |            | 105 |
| C.crescentus   | TESSVLSRLGNPSTRGTFEENTWYYISATRESLAYLRPATRDRRI IAVTFDENGLVSDVA |            | 105 |
|                | * . * : * . * . * : * * . : : : * : . . :                     |            |     |
| E.coli         | NK--PALSGN-----                                               |            | 113 |
| S.enterica     | NK--PALTK-----                                                |            | 112 |
| P.aeruginosa   | GDFMPGVS RDEAILGKEGSTTVTQPADQOKPEAQKEEPPKPGSTLEQLQREVDEAQVVPV |            | 165 |
| N.meningitidis | GDV LQNAA--EALKD-----RQNTDKP-----                             |            | 125 |
| C.crescentus   | EYGLED-GRVVAIADR-----ETPTRGRELTFLEQLLGNVGRLLPT                |            | 144 |

**BamD:**

|                |                                                                |  |     |
|----------------|----------------------------------------------------------------|--|-----|
| E.coli         | MT-----RMKYLVAATLSLFLAGCSGS-----KEEVP-DNPPNEIYATAQQKLQDGNWR    |  | 49  |
| S.enterica     | MT-----RMKYLVAATLSLFLAGCSGS-----KEEVP-DNPPNEIYATAQQKLQDGNWK    |  | 49  |
| P.aeruginosa   | -M-----QVKHLLLIAILALT-AACSS-----NKETVDENLSESQLYQQAQDDLNNKSYN   |  | 48  |
| N.meningitidis | -----MKKILLTVSLGLALSACATQGTVDKDAQITQDWSVEKLYAEAQDELNSSNYT      |  | 52  |
| C.crescentus   | MLRIFQGRPAVTIAAVLVAASVAGCAGK--AKKPTLVYEERPVELLYSTGADRLDRGNWN   |  | 58  |
|                | : . : . : * : : : * : : * : :                                  |  |     |
| E.coli         | QAITQLEALDNRYFPFGPYSQQVQLDLIYAYYKNADLPLAQAAIDRFIRLNPHNIDYVM    |  | 109 |
| S.enterica     | QAITQLEALDNRYFPFGPYSQQVQLDLIYAYYKNADLPLAQAAIDRFMRNLNPHNIDYVM   |  | 109 |
| P.aeruginosa   | SAVTKLKALESRYPFGRYAEQAQLELIYANYKNMEPEAARAAAERFIRLHPQHPNVDYAY   |  | 108 |
| N.meningitidis | RAVKLYEILESRFPTS RHAQQSQLD TAYAYYK DDEKDKALAAIDRFRLHPQHPNMDYAL |  | 112 |
| C.crescentus   | EAVDYFREVERQHPYSEWSRRSILMTGYAHYMGNYAEAI GDADRFISLYPGNPSAQYAF   |  | 118 |
|                | * : . : : * . : : * * * . : * . : * * * * : * . : *            |  |     |
| E.coli         | YMRGLTNMALDDSDALQGGVDRSDRDPQHARA AFSDFSKLV RGY PNSQYTTDATKRLVF |  | 169 |
| S.enterica     | YMRGLTNMALDDSVLQGGVDRSDRDPQHARA A FND FSKLVRSYPNSQYTTDATKRLVF  |  | 169 |
| P.aeruginosa   | YLKGLSSFDQDRGLLARFLPLDMTKRDPGAARDSFN EFAQLTSRFPNSRYAPDAKARMVY  |  | 168 |
| N.meningitidis | YLRGLVLFNEDQSFLNKLASQDWSDRDPKANREAYQAF AELVQRFPN SKYAADATARMVK |  | 172 |
| C.crescentus   | YLKAICYFEQIV-----DVNRDQAATEQALAAALRDVVQRYPNTEYATDARLKIDM       |  | 168 |
|                | * : : : : : : . * * . : : : . : : * * : * * : *                |  |     |
|                | <b>R197</b>                                                    |  |     |
| E.coli         | LKDRLAKYEYSVAEYYTERGAWVAVVNRVEGMLRDY PDTQATRDALPLMENAYRQMOMNA  |  | 229 |
| S.enterica     | LKDRLAKYEYSVAEYYTARGAWVAVVNRVEGMLRNY PDTQATRDALPLMENAYRQMQLNA  |  | 229 |
| P.aeruginosa   | LRNLLAAYEVHVGHYYLKRQAYVAAANRGRYVVENFQETPAVGDGLAIMVEAYRRLGLDD   |  | 228 |
| N.meningitidis | LVDALGGNEMSVARYMYMKRGAYIAAANRAQKIIGSYQNTRYVEESLAILELAYKKLDKPR  |  | 232 |
| C.crescentus   | VNDQLAGKEMAIGRWYLNKGQTLAAIGRFKAVIERHQ TTSHTPEALFRLVEAYLTIGLNE  |  | 228 |
|                | : : * . * : : : * . : * . : * . : * : * * :                    |  |     |
|                | <b>K233</b>                                                    |  |     |
| E.coli         | QAEK VAKIIAANSSNT-----                                         |  | 245 |
| S.enterica     | QADK VAKIIAANSKNT-----                                         |  | 245 |
| P.aeruginosa   | LASTSLET LKLNYPDNASLK DGEFVARESEADTRSWLAKATLGLIEGGEPPPHMETQAAK |  | 288 |
| N.meningitidis | LAADTRRVLETNFPKSPFLKQP-----WRSD DMP-----                       |  | 261 |
| C.crescentus   | EAKRNGAVLGYNFPGDRWYVDAYRLLNDNG--LRPAV-----EPLKAGAKRNALER----   |  | 277 |

```

*           :   *
E.coli      ----- 245
S.enterica  ----- 245
P.aeruginosa DVIKQYEDAEREI PAELKPENQDHSADDEKPE SDDDEDSGRSWWSYMTFGLFD 341
N.meningitidis -----WWRYWH----- 267
C.crescentus -ILSKDKEATLAPPGERKAK-----KG--LL--GPLGM-- 305

```

**BamA (POTRA5) :**

**Y348**

```

E.coli      GTKVTKMEDDIKLLGRYGYAYPRVQSMPEINDADKTVKLRVNV DAGNRFYVRKIRFEGN 357
S.enterica  GTKVTKMEDDIKLLGRYGYAYPRVQSQPEINDADKTVKLRVNV DAGNRFYVRKIRFEGN 357
P.aeruginosa RKVMTTTSDLITRRLGNEG YTFANVNGVPEAHDDDKTVSVTFVVDPGKRAYVNRINFRGN 356
N.meningitidis RQQMTAVLGEIQNRMG SAGYAYSEISVQPLPNAETKTVDFVLHIEPGRKIYVNEIHITGN 357
C.crescentus DERIEQATDALTF AAGAAGFAFVDVRPRYVPNRET KTVDVVFQVREGPRVYVDRIDIVGN 355

```

```

: . : * *::: : : ***. . : * : ** .* : **

```

**E373**

```

E.coli      DTSKDAVLRREMRQMEGAWLGS DLVDQGKERLNRLGFFETVDTDTQRVPGSPDQVDV VYK 417
S.enterica  DTSKDSVLRREMRQMEGAWLGS DLVDQGKERLNRLGFFETVDTDTQRVPGSPDQVDV VYK 417
P.aeruginosa TKTEDEVLRREMRQMEGGWASTYLIDQSKARLERLGYFKEVNVETPAVPGTDDQVDV NYS 416
N.meningitidis NKTRDEVVRREL RQME S APYDTSKLQRSKERV ELLGYFDNVQFD AVPLAGTPDKVDLNMS 417
C.crescentus TRTLDYVLRRELEVAEGDAYNRVLVDRSKNNMRRLGFFKEVEIEDAP-GSAPDR TSLRVK 414

```

```

: * *:*:*:. * . . :::.* ... **:*.* * : : .: *::: .

```

**Figure S4. *In silico* mutagenesis of the BamE/BamA interfacing Y37 residue.** (A) Y37P is not predicted to affect overall structure (A) but weakness BamE/BamA interface (B) by lowering a number of polar contacts (C). Protein sequences of mature (devoid of their signal sequences) BamE, or BamE and BamA, were analyzed using ColabFold (MMseqs2 with AlphaFold2-multimer). The interaction interface based on the top-scoring models is shown. The residues establishing polar contacts were identified using the PDBePISA.

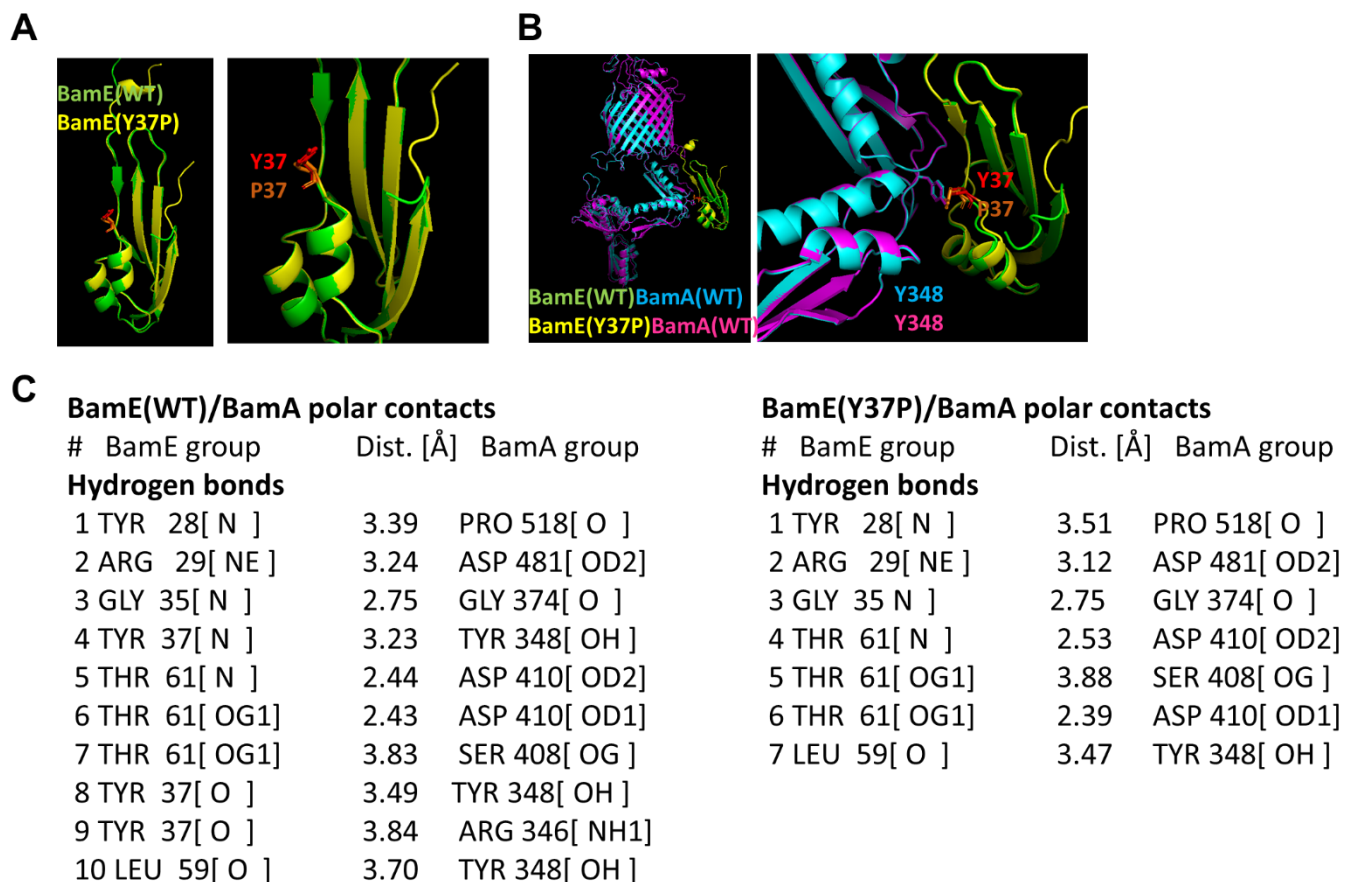

**Figure S5. *In silico* mutagenesis of the BamE/BamD interfacing D66 residue.** (A) D66R is not predicted to affect overall structure (A) but weakness BamE/BamD interface (B) by lowering a number of polar contacts (C). Protein sequences of mature (devoid of their signal sequences) BamE, or BamE and BamD, were analyzed using ColabFold (MMseqs2 with AlphaFold2-multimer). The interaction interface based on the top-scoring models is shown. The residues establishing polar contacts were identified using the PDBePISA.

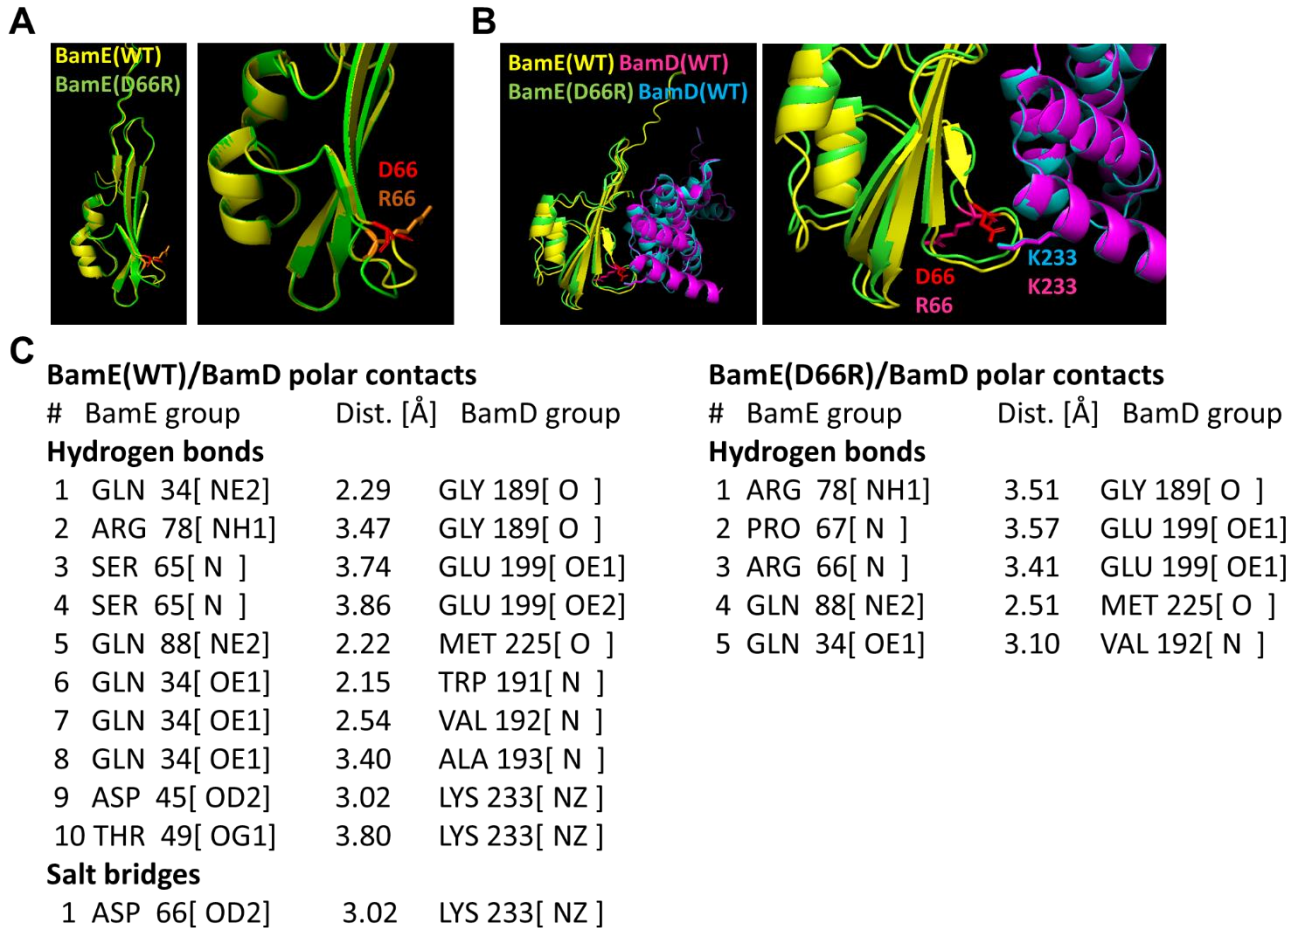

**Figure S6. Immunoblot analysis of Strep-BamA and BamE-His protein levels expressed from pZS21 and pTrc99a plasmids relatively to the MC4100 parent strain. Note, addition of His8 tag to BamE increases its size by 1 kDa resulting in a size shift.**

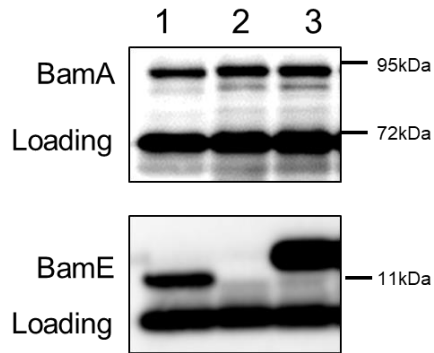

| Lane | Strain# | Short genotype                                                           |
|------|---------|--------------------------------------------------------------------------|
| 1    | MC4100  | Wild-type                                                                |
| 2    | SK-80   | $\Delta bamE \Delta bamA // pZS21::Strep-bamA$ pTrc99a                   |
| 3    | SK-81   | $\Delta bamE \Delta bamA // pZS21::Strep-bamA$ pTrc99a:: <i>bamE-His</i> |

**Figure S7. Immunoblot quantification of *in vivo* pull-down analysis presented in Fig. 3 based on three independent biological replicates.** (A) BamE-His pull-down, and (B) Strep-BamA pull-down. Graphs represent the quantification of corresponding bands normalized to the level of the bait protein, BamE-His (A) and Strep-BamA (B), and compared to that of the *bamE*(WT) strain. Graphs represent mean  $\pm$  SD. Statistical analysis was performed by using one-way ANOVA in comparison with the WT control. n.s. =  $P \geq 0.05$ , \*\* $P < 0.01$ , \*\*\*\* $P < 0.0001$ .

**A BamE-His pull-down**

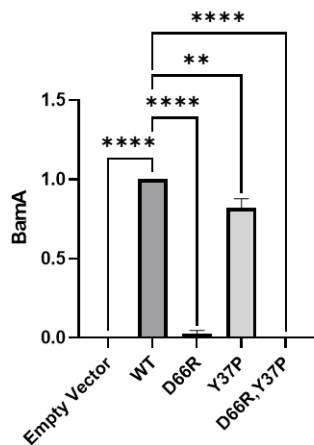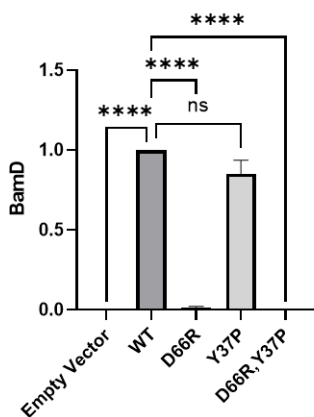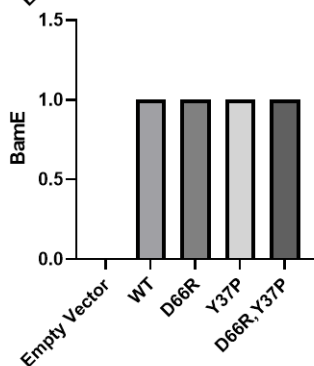

**B Strep-BamA pull-down**

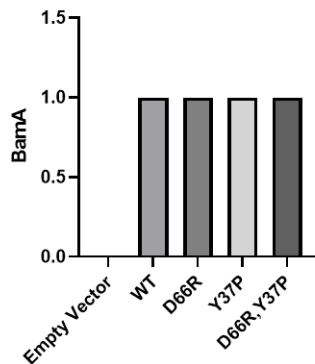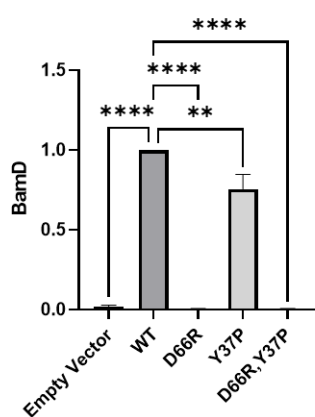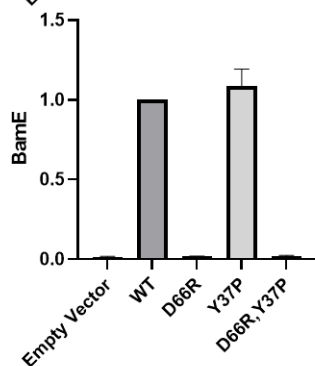



**Figure S8. Phenotypic characterization of *bamE*(Y37G) mutant.** (A, B) Effect of *bamE* mutations on BamA/BamD/BamE complex stability *in vivo* using Ni-NTA pull-down of BamE-His variants (A) or Streptactin pull-down of Strep-BamA in the presence of BamE-His variants (B). (C) Immunoblot analysis of *in vivo* formaldehyde cross-linked samples probed with  $\alpha$ -BamA (Top) and  $\alpha$ -RcsF antibodies (bottom). Quantification of RcsF/BamA and RcsF/OmpA cross-linking bands based on three independent biological replicates relative to the WT control, mean $\pm$  SD. Statistical analysis was performed by using one-way ANOVA in comparison with the WT control. n.s. =  $P \geq 0.05$ , \*\* $P < 0.01$ , \*\*\*\* $P < 0.0001$ . (E) Growth curve analysis of the AK-1255 [ $\Delta$ *bamE bamB8 P<sub>BAD</sub>-bamE*] derivative strains containing an empty vector and vectors with indicated *bamE* alleles in the absence of arabinose. Growth was monitored as described in Fig. 3.

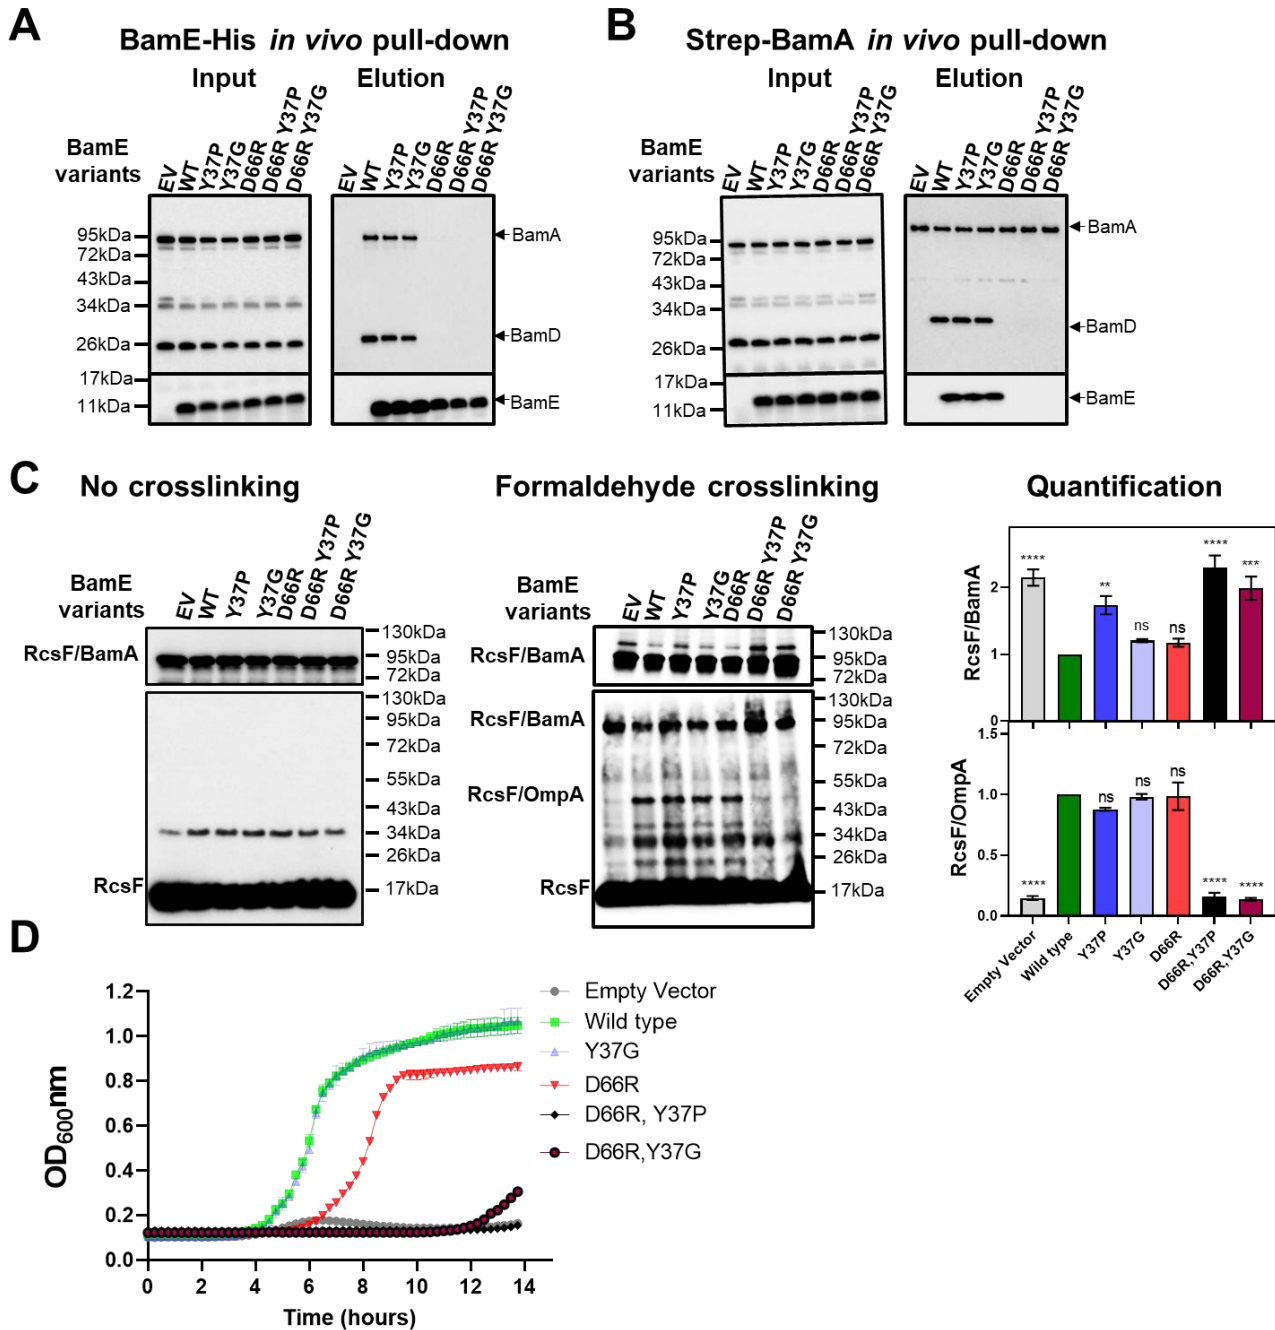

**Figure S9. Phenotypic characterization of *bamE(D66G)* mutant.** (A, B) Effect of *bamE* mutations on BamA/BamD/BamE complex stability *in vivo* using Ni-NTA pull-down of BamE-His variants (A) or Streptactin pull-down of Strep-BamA in the presence of BamE-His variants (B). Note that unlike *bamE(D66R)*, *bamE(D66G)* mutation alone does not destabilize the Bam complex. (C) Immunoblot analysis of *in vivo* formaldehyde cross-linked samples probed with  $\alpha$ -BamA (Top) and  $\alpha$ -RcsF antibodies (bottom). Quantification of RcsF/BamA and RcsF/OmpA cross-linking bands based on three independent biological replicates relative to the WT control, mean $\pm$  SD. Statistical analysis was performed by using one-way ANOVA in comparison with the WT control. n.s. =  $P \geq 0.05$ , \*\*\* $P < 0.001$ . (E) Growth curve analysis of the AK-1255 [ $\Delta$ *bamE bamB8 P<sub>BAD</sub>-bamE*] derivative strains containing an empty vector and vectors with indicated *bamE* alleles in the absence of arabinose. Growth was monitored as described in Fig. 3.

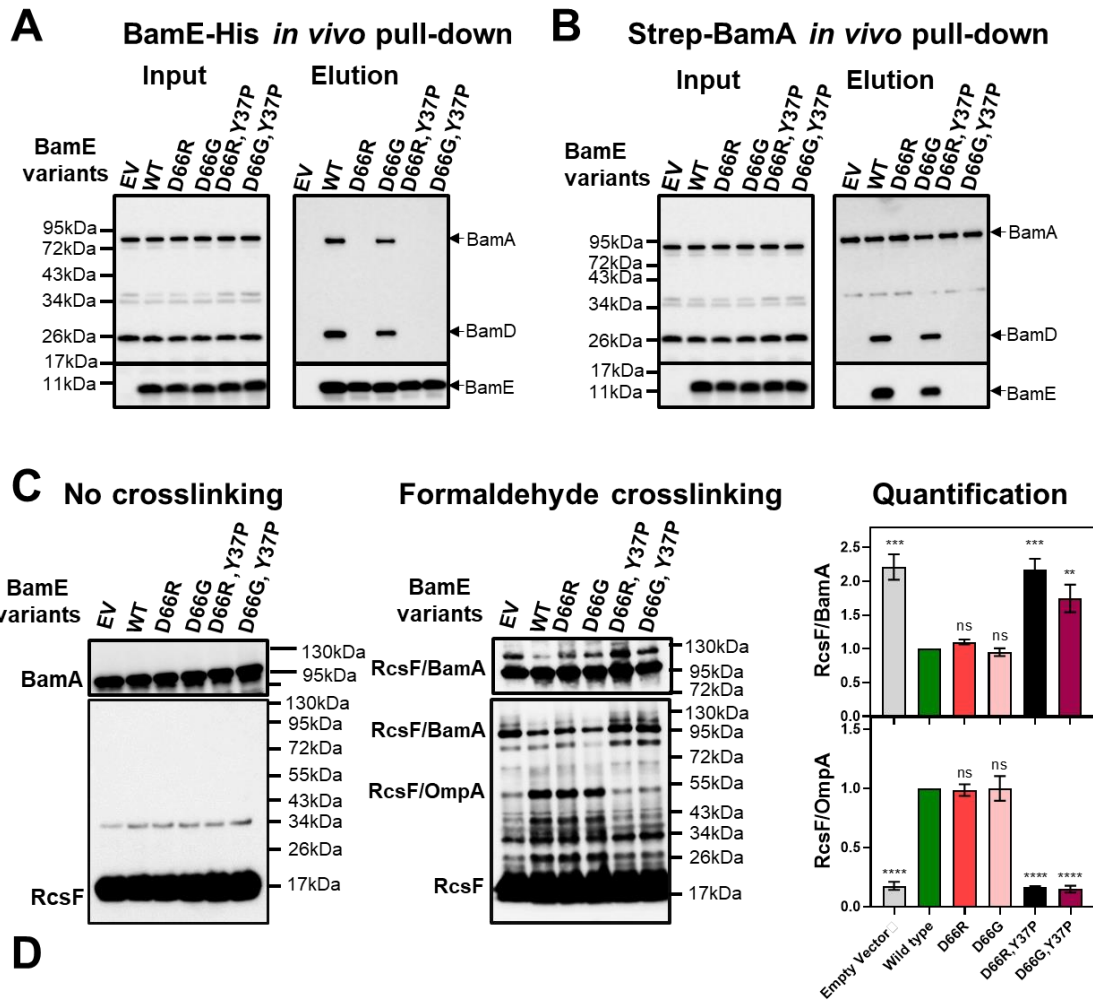

**Figure S10. Plate growth phenotype of SK-130 [ $\Delta bamE \Delta bamA P_{BAD}bamA // pZS21:Strep-bamA(373A)$ ] and the  $\Delta rcsF$  variant SK-155. Strains constructed and propagated in the presence of arabinose to allow expression of the chromosomal *bamA(WT)* allele. To test for genetic interaction, strains were streaked on indicated agar plates without arabinose; plates were incubated at 30°C or 37°C. Growth was assayed after 24 hours.**

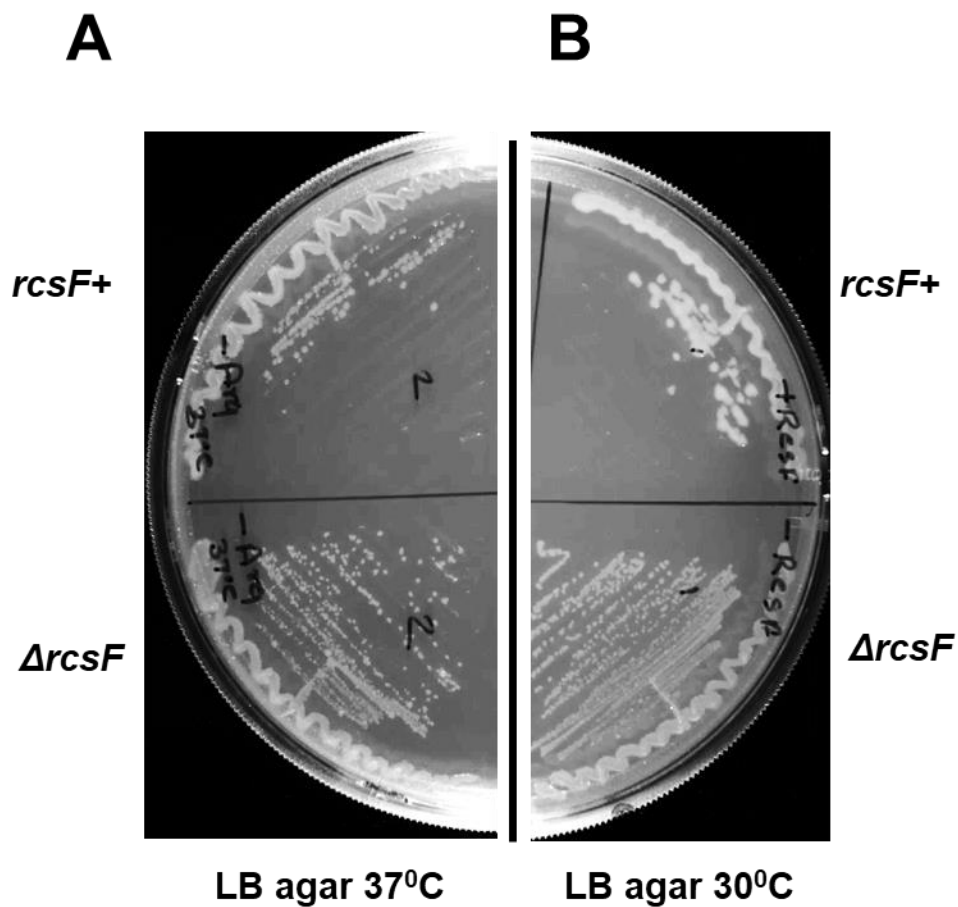

**Figure S11. Plate growth phenotype of empty vector or pTrc99a::*bamE* variants in the SK-130 [ $\Delta$ *bamE*  $\Delta$ *bamA*  $P_{BAD}$ -*bamA* // *pZS21*:*Strep-bamA*(373A)] (A) and MT-171 [*bamE*::*cm bamD*(R197L) *nadB*::*Tn10*] (B) genetic backgrounds. Growth was assayed under permissive (M9 glucose minimal agar at 30°C, after 48 hrs) or non-permissive (LB agar at 37°C after 24 hrs) conditions.**

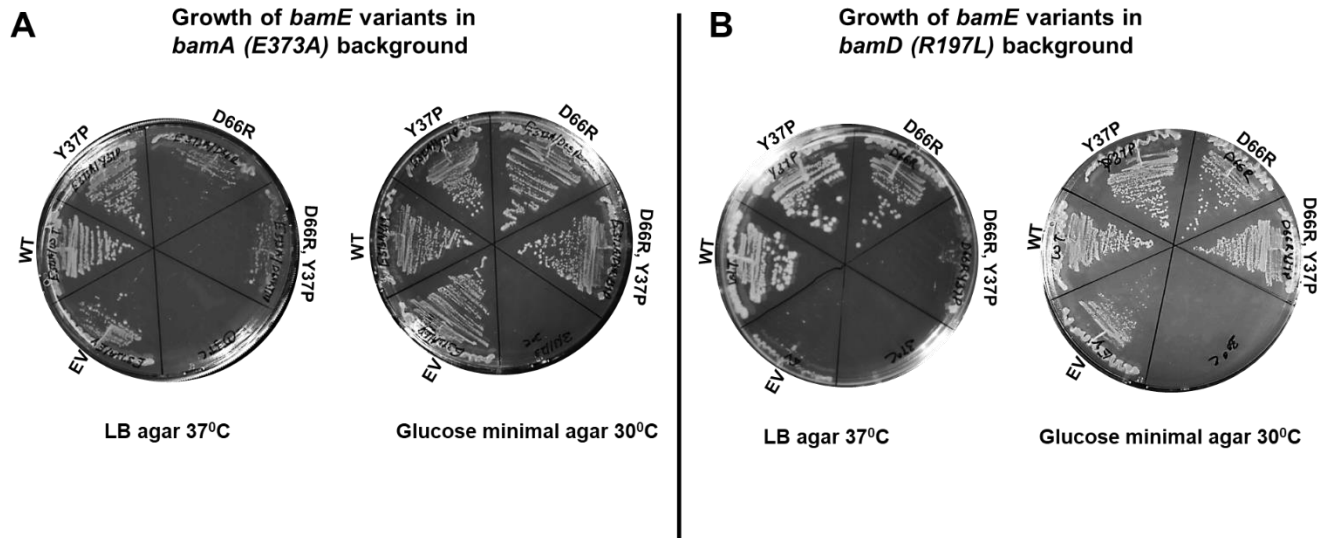

**Figure S12. Immunoblot quantification of *in vivo* pull-down analysis presented in Fig. 4 based on three independent biological replicates.** BamE-His (A) and Strep-BamA (B) pull-downs in the SK-130 [ $\Delta bamE \Delta bamA P_{BAD}-bamA // pZS21:Strep-bamA(373A)$ ] genetic background; BamE-His (C) and Strep-BamA (D) pull-downs in the MT-171 [ $bamE::cm bamD(R197L) nadB::Tn10$ ] (B) genetic background. Graphs represent the quantification of corresponding bands normalized to the level of the bait protein, BamE-His (A, C) and Strep-BamA (B, D), and compared to that of the *bamE(WT)* strain. Graphs represent mean  $\pm$  SD. Statistical analysis was performed by using one-way ANOVA in comparison with the WT control. n.s. =  $P \geq 0.05$ , \*\*\*\* $P < 0.0001$ .

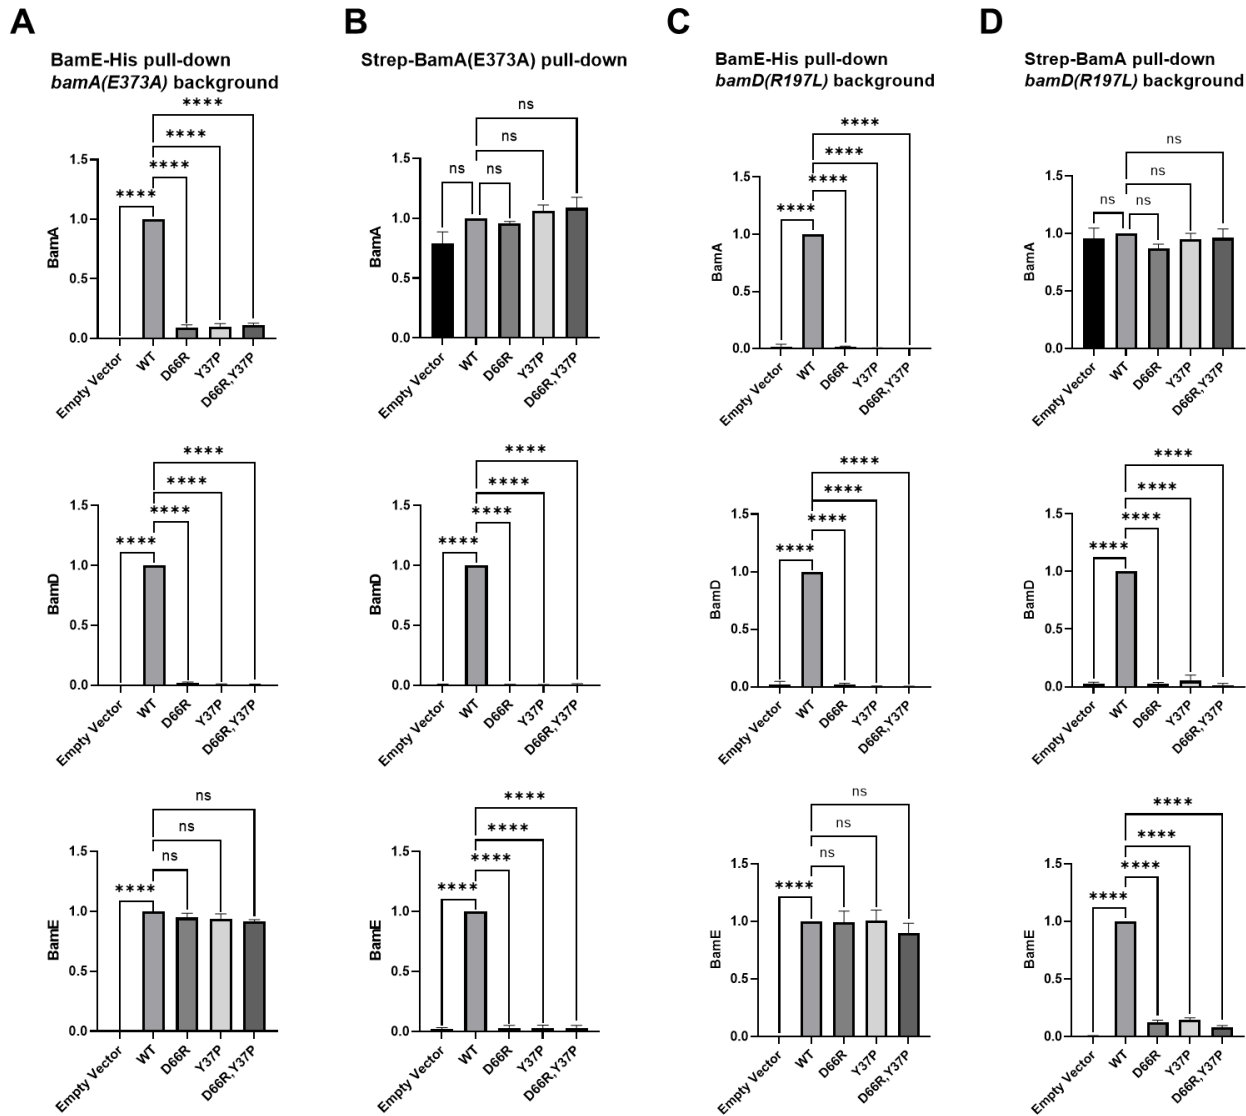

**Table S1. Polar contact between BamE and BamA predicted based on the ColabFold protein complex modeling.** Analysis of interacting interfaces was performed by using the PDBePISA server (Krissinel & Henrick, 2007).

| <b>Interaction of BamE/BamA interface in <i>E. coli</i></b>         |              |             |              |                    |                    |
|---------------------------------------------------------------------|--------------|-------------|--------------|--------------------|--------------------|
| <b>BamE</b>                                                         | <b>Group</b> | <b>BamA</b> | <b>Group</b> | <b>Distance, A</b> | <b>interaction</b> |
| TYR37                                                               | [ N ]        | TYR348      | [ OH ]       | 3.11               | H-bond             |
| TYR37                                                               | [ O ]        | TYR348      | [ OH ]       | 3.53               | H-bond             |
| GLN34                                                               | [ NE2]       | GLU373      | [ O ]        | 3.36               | H-bond             |
| GLY35                                                               | [ N ]        | GLY374      | [ O ]        | 2.78               | H-bond             |
| THR61                                                               | [ N ]        | ASP410      | [ OD2]       | 3.00               | H-bond             |
| THR61                                                               | [ OG1]       | ASP410      | [ OD1]       | 2.93               | H-bond             |
| <b>Interaction of BamE/BamA interface in <i>S. enterica</i></b>     |              |             |              |                    |                    |
| TYR37                                                               | [ N ]        | TYR348      | [ OH ]       | 3.28               | H-bond             |
| TYR37                                                               | [ O ]        | TYR348      | [ OH ]       | 3.57               | H-bond             |
| GLY35                                                               | [ N ]        | GLY374      | [ O ]        | 3.06               | H-bond             |
| THR61                                                               | [ OG1]       | ASP410      | [ OD1]       | 2.63               | H-bond             |
| THR61                                                               | [ N ]        | ASP410      | [ OD2]       | 3.05               | H-bond             |
| <b>Interaction of BamE/BamA interface in <i>P. aeruginosa</i></b>   |              |             |              |                    |                    |
| VAL37                                                               | [ N ]        | TYR347      | [ OH ]       | 2.66               | H-bond             |
| GLY35                                                               | [ N ]        | GLY373      | [ O ]        | 2.59               | H-bond             |
| ASN61                                                               | [ N ]        | ASP409      | [ OD2]       | 2.75               | H-bond             |
| GLN34                                                               | [ NE2]       | GLU372      | [ O ]        | 2.92               | H-bond             |
| PHE24                                                               | [ O ]        | TYR518      | [ OH ]       | 3.57               | H-bond             |
| TYR28                                                               | [ N ]        | PRO519      | [ O ]        | 3.43               | H-bond             |
| <b>Interaction of BamE/BamA interface in <i>N. meningitides</i></b> |              |             |              |                    |                    |
| GLU37                                                               | [ N ]        | TYR348      | [ OH ]       | 3.16               | H-bond             |
| GLY35                                                               | [ N ]        | SER374      | [ O ]        | 2.75               | H-bond             |
| SER62                                                               | [ N ]        | ASP410      | [ OD2]       | 2.72               | H-bond             |
| SER27                                                               | [ OG ]       | ASP481      | [ OD2]       | 2.83               | H-bond             |
| <b>Interaction of BamE/BamA interface in <i>C. crescentus</i></b>   |              |             |              |                    |                    |
| TYR32                                                               | [ N ]        | TYR346      | [ OH ]       | 3.62               | H-bond             |
| GLY29                                                               | [ N ]        | ASP33       | [ OD1]       | 2.84               | H-bond             |
| PRO57                                                               | [ O ]        | ARG408      | [ NH2]       | 2.03               | H-bond             |
| SER58                                                               | [ O ]        | ARG408      | [ NH1]       | 3.48               | H-bond             |
| ANS56                                                               | [ ND2]       | ASP407      | [ OD1]       | 2.37               | H-bond             |

**Table S2. Polar contact between BamE and BamD predicted based on the ColabFold protein complex modeling.** Analysis of interacting interfaces was performed by using the PDBePISA server (Krissinel & Henrick, 2007).

| <b>Interaction of BamE/BamD interface in <i>E. coli</i></b>         |              |             |              |                    |                    |
|---------------------------------------------------------------------|--------------|-------------|--------------|--------------------|--------------------|
| <b>BamE</b>                                                         | <b>Group</b> | <b>BamD</b> | <b>Group</b> | <b>Distance, A</b> | <b>Interaction</b> |
| GLN34                                                               | [ NE2 ]      | GLY189      | [ O ]        | 2.74               | H-bond             |
| GLN34                                                               | [ OE1 ]      | TRP191      | [ N ]        | 2.63               | H-bond             |
| SER65                                                               | [ OG ]       | GLU199      | [ OE1 ]      | 3.09               | H-bond             |
| SER111                                                              | [ O ]        | GLN226      | [ NE2 ]      | 2.91               | H-bond             |
| SER111                                                              | [ N ]        | GLN226      | [ OE1 ]      | 3.04               | H-bond             |
| ASP66                                                               | [ OD2 ]      | K233        | [ NZ ]       | 2.81               | Salt bridge        |
| <b>Interaction of BamE/BamD interface in <i>S. enterica</i></b>     |              |             |              |                    |                    |
| THR65                                                               | [ OG1 ]      | GLU199      | [ OE1 ]      | 3.13               | H-bond             |
| GLN34                                                               | [ NE2 ]      | GLY189      | [ O ]        | 2.68               | H-bond             |
| GLN34                                                               | [ OE1 ]      | TRP191      | [ N ]        | 2.63               | H-bond             |
| THR111                                                              | [ OG1 ]      | GLN228      | [ OE1 ]      | 2.84               | H-bond             |
| ASP66                                                               | [ OD2 ]      | GLN230      | [ NE2 ]      | 3.30               | H-bond             |
| ASP66                                                               | [ OD2 ]      | LYS233      | [ NZ ]       | 2.96               | Salt-bridge        |
| <b>Interaction of BamE/BamD interface in <i>P. aeruginosa</i></b>   |              |             |              |                    |                    |
| ARG66                                                               | [ NH1 ]      | TYR294      | [ OH ]       | 2.77               | H-bond             |
| THR77                                                               | [ OG1 ]      | GLU202      | [ OE1 ]      | 3.02               | H-bond             |
| GLN98                                                               | [ NE2 ]      | L224        | [ O ]        | 2.70               | H-bond             |
| ARG100                                                              | [ NH1 ]      | G225        | [ O ]        | 2.99               | H-bond             |
| <b>Interaction of BamE/BamD interface in <i>N. meningitides</i></b> |              |             |              |                    |                    |
| GLN34                                                               | [ OE1 ]      | TYR193      | [ N ]        | 3.23               | H-bond             |
| ARG65                                                               | [ O ]        | GLN201      | [ NE2 ]      | 3.07               | H-bond             |
| TYR75                                                               | [ O ]        | LYS229      | [ NZ ]       | 3.81               | H-bond             |
| ARG88                                                               | [ NH2 ]      | LYS226      | [ O ]        | 2.99               | H-bond             |
| ARG88                                                               | [ NH1 ]      | ASP229      | [ OD2 ]      | 3.26               | Salt- bridge       |
| TYR94                                                               | [ OH ]       | ARG232      | [ NH1 ]      | 3.31               | H-bond             |
| <b>Interaction of BamE/BamD interface in <i>C. crescentus</i></b>   |              |             |              |                    |                    |
| THR61                                                               | [ OG1 ]      | N234        | [ ND2 ]      | 3.39               | H-bond             |
| GLU63                                                               | [ OE2 ]      | ARG233      | [ NH ]       | 2.34               | Salt bridge        |
| R59                                                                 | [ O ]        | LYS197      | [ NZ ]       | 2.35               | H-bond             |
| T58                                                                 | [ OG1 ]      | LYS197      | [ NZ ]       | 2.96               | H-bond             |

**Table S3. Strains used in this study.** Unless otherwise indicated, the host background is MC4100 (JCM158).

| Strain     | Genotype                                                                                                                 | Reference                         |
|------------|--------------------------------------------------------------------------------------------------------------------------|-----------------------------------|
| Mach-1     | F- $\phi 80(lacZ)\Delta M15 \Delta lacX74 hsdR(rK-mK+) \Delta recA1398 endA1 tonA$                                       | Invitrogen                        |
| pET15b     |                                                                                                                          | Novagen                           |
| pTrc99a    |                                                                                                                          | (Amann <i>et al.</i> , 1988)      |
| pZS21      |                                                                                                                          | (Lutz & Bujard, 1997)             |
| JCM158     | MC4100 <i>araR</i> -                                                                                                     | (Malinverni <i>et al.</i> , 2006) |
| JCM320     | MC4100 <i>araR</i> -; $\Delta bamA \lambda att$ ( $P_{BAD}$ - <i>bamA</i> , <i>bla'</i> )                                | (Wu <i>et al.</i> , 2005)         |
| BL21 (DE3) | F- <i>ompT hsdSB (rB- mB-) gal dcm (DE3)</i>                                                                             | Novagen                           |
| SK05       | BL21 (DE3)-pET15b::His- <i>bamA</i>                                                                                      | (Tata <i>et al.</i> , 2021)       |
| SK28       | BL21 (DE3)-pET15b:: <i>bamE</i> -Strep                                                                                   | This study                        |
| SK29       | BL21 (DE3)-pET15b:: <i>bamD</i> -Strep                                                                                   | This study                        |
| SK35       | BL21 (DE3)-pET15b:: <i>bamD</i> -His                                                                                     | This study                        |
| SK36       | BL21 (DE3)-pET15b:: <i>bamE</i> -His                                                                                     | This study                        |
| SK110      | BL21 (DE3)-pET15b:: <i>bamE</i> -His(D66R)                                                                               | This study                        |
| SK95       | BL21 (DE3)-pET15b:: <i>bamE</i> -Strep(Y37P)                                                                             | This study                        |
| SK-129     | $\Delta bamA \lambda att$ ( $P_{BAD}$ - <i>bamA</i> , <i>bla'</i> ) $\Delta bamE$<br>//pZS21-Twin-Strep-tag- <i>bamA</i> | This study                        |
| MT-428     | $\Delta bamA$ , $\Delta bamE$ , $\Delta rcsF nadB::Tn10$<br>// pZS21-Twin-Strep-tag- <i>bamA</i>                         | (Tata <i>et al.</i> , 2021)       |
| SK-77      | MT-428//pTrc99a                                                                                                          | This study                        |
| SK-78      | MT-428//pTrc99a:: <i>bamE</i> -His8                                                                                      | This study                        |
| BL21 (DE3) | F- <i>ompT hsdSB (rB- mB-) gal dcm (DE3)</i>                                                                             | Novagen                           |
| SK05       | BL21 (DE3)-pET15b::His- <i>bamA</i>                                                                                      | (Tata <i>et al.</i> , 2021)       |
| SK28       | BL21 (DE3)-pET15b:: <i>bamE</i> -Strep                                                                                   | This study                        |
| SK29       | BL21 (DE3)-pET15b:: <i>bamD</i> -Strep                                                                                   | This study                        |
| SK35       | BL21 (DE3)-pET15b:: <i>bamD</i> -His                                                                                     | This study                        |
| SK36       | BL21 (DE3)-pET15b:: <i>bamE</i> -His                                                                                     | This study                        |
| SK110      | BL21 (DE3)-pET15b:: <i>bamE</i> -His(D66R)                                                                               | This study                        |
| SK95       | BL21 (DE3)-pET15b:: <i>bamE</i> -Strep(Y37P)                                                                             | This study                        |
| pTrc99a    |                                                                                                                          | (Amann <i>et al.</i> , 1988)      |
| AK-790     | $\Delta bamE \lambda att$ ( $P_{PrpA}$ - <i>lacZ</i> )                                                                   | (Tata & Konovalova, 2019)         |
| SK37       | AK790//pTrc99a                                                                                                           | This study                        |
| SK38       | AK790// pTrc99a:: <i>bamE</i> -His8                                                                                      | This study                        |
| SK43       | AK790- pTrc99a:: <i>bamE</i> -His8 (D66R)                                                                                | This study                        |
| SK44       | AK790- pTrc99a:: <i>bamE</i> -His8 (D66G)                                                                                | This study                        |
| SK45       | AK790- pTrc99a:: <i>bamE</i> -His8 (Y37P)                                                                                | This study                        |
| SK46       | AK790- pTrc99a:: <i>bamE</i> -His8 (D66R,Y37P)                                                                           | This study                        |
| SK41       | AK790- pTrc99a:: <i>bamE</i> -His8 (Y37G)                                                                                | This study                        |
| SK100      | AK790- pTrc99a:: <i>bamE</i> -His8 (D66R,Y37G)                                                                           | This study                        |
| SK102      | AK790- pTrc99a:: <i>bamE</i> -His8 (D66G,Y37P)                                                                           | This study                        |
| AK-1255    | $\Delta araBAD \Delta bamE \lambda att$ ( $P_{BAD}$ - <i>bamE</i> , <i>bla'</i> ) <i>bamB8 yfhS::Tn10</i>                | (Tata <i>et al.</i> , 2021)       |
| SK49       | AK1255-pTrc99a                                                                                                           | This study                        |
| SK50       | AK1255-pTrc99a:: <i>bamE</i> -His8                                                                                       | This study                        |
| SK55       | AK1255-pTrc99a:: <i>bamE</i> -His8(D66R)                                                                                 | This study                        |
| SK56       | AK1255-pTrc99a:: <i>bamE</i> -His8(D66G)                                                                                 | This study                        |



|         |                                                                                                                                                |                                   |
|---------|------------------------------------------------------------------------------------------------------------------------------------------------|-----------------------------------|
| SK57    | AK1255-pTrc99a:: <i>bamE</i> -His8(Y37P)                                                                                                       | This study                        |
| SK58    | AK1255-pTrc99a:: <i>bamE</i> -His8(D66R,Y37P)                                                                                                  | This study                        |
| SK53    | AK1255-pTrc99a:: <i>bamE</i> -His8(Y37G)                                                                                                       | This study                        |
| SK97    | AK1255-pTrc99a:: <i>bamE</i> -His8(D66R,Y37G)                                                                                                  | This study                        |
| SK99    | AK1255-pTrc99a:: <i>bamE</i> -His8(D66G,Y37P)                                                                                                  | This study                        |
| MT-567  | $\Delta$ <i>bamA</i> $\Delta$ <i>bamE</i> <i>nadA</i> ::Tn10 $\lambda$ <i>att</i> ( <i>PrprA-lacZ</i> )// <i>pZS21-Twin-Strep-tag-bamA</i>     | (Tata <i>et al.</i> , 2021)       |
| SK80    | MT567-pTrc99a                                                                                                                                  | This study                        |
| SK81    | MT567-pTrc99a:: <i>bamE</i> -His8                                                                                                              | This study                        |
| SK84    | MT567-pTrc99a:: <i>bamE</i> -His8 (Y37G)                                                                                                       | This study                        |
| SK86    | MT567-pTrc99a:: <i>bamE</i> -His8 (D66R)                                                                                                       | This study                        |
| SK87    | MT567-pTrc99a:: <i>bamE</i> -His8 (D66G)                                                                                                       | This study                        |
| SK88    | MT567-pTrc99a:: <i>bamE</i> -His8 (Y37P)                                                                                                       | This study                        |
| SK89    | MT567-pTrc99a:: <i>bamE</i> -His8 (D66R,Y37P)                                                                                                  | This study                        |
| SK103   | MT567-pTrc99a:: <i>bamE</i> -His8 (D66R,Y37G)                                                                                                  | This study                        |
| SK105   | MT567-pTrc99a:: <i>bamE</i> -His8 (D66G, Y37P)                                                                                                 | This study                        |
| SK-130  | $\Delta$ <i>bamA</i> <i>latt</i> ( <i>P<sub>BAD</sub>-bamA</i> , <i>bla</i> ) $\Delta$ <i>bamE</i> // <i>pZS21-Twin-Strep-tag-bamA</i> (E373A) | This study                        |
| SK-131  | SK-130//pTrc99a                                                                                                                                | This study                        |
| SK-132  | SK-130// pTrc99a:: <i>bamE</i> -His8                                                                                                           | This study                        |
| SK-133  | SK-130// pTrc99a:: <i>bamE</i> -His8 (Y37P)                                                                                                    | This study                        |
| SK-134  | SK-130//pTrc99a:: <i>bamE</i> -His8 (D66R)                                                                                                     | This study                        |
| SK-135  | SK-130//pTrc99a:: <i>bamE</i> -His8 (D66R,Y37P)                                                                                                | This study                        |
| SK 155  | SK-130 $\Delta$ <i>rscF</i>                                                                                                                    | This study                        |
| MT-171  | <i>bamD</i> (R197L) <i>nadB</i> ::Tn10 <i>bamE</i> :: <i>Cm latt</i> ( <i>PrprA-lacZ</i> )                                                     | (Tata & Konovalova, 2019)         |
| AK-1233 | MT-171 $\Delta$ <i>rscF</i>                                                                                                                    | (Malinverni <i>et al.</i> , 2006) |
| SK-141  | MT-171//pTrc99a                                                                                                                                | This study                        |
| SK-142  | MT-171// pTrc99a:: <i>bamE</i> -His8                                                                                                           | This study                        |
| SK-143  | MT-171// pTrc99a:: <i>bamE</i> -His8 (Y37P)                                                                                                    | This study                        |
| SK-144  | MT-171//pTrc99a:: <i>bamE</i> -His8 (D66R)                                                                                                     | This study                        |
| SK-145  | MT-171//pTrc99a:: <i>bamE</i> -His8 (D66R,Y37P)                                                                                                | This study                        |



## SUPPLEMENTAL MATERIALS METHODS

**Bacterial strains and growth conditions:** All the bacterial strains used in this study are listed in Table S3, and derived from MC4100 unless otherwise stated. Strains were grown at either 37°C or 30°C as indicated in Lysogeny broth (LB) (10 g/L tryptone, 5 g/L yeast extract, 10 g/L NaCl) or M9 glucose minimal medium (26.1 mM Na<sub>2</sub>HPO<sub>4</sub>, 22 mM KH<sub>2</sub>PO<sub>4</sub>, 8.5 mM NaCl, 18.6 mM NH<sub>4</sub>Cl, 0.2% glucose, 1 mM MgSO<sub>4</sub>, 100 µg/ml thiamine and 100 µM β-NAD hydrate to support the growth of *nadA::Tn10* and *nadB::Tn10* strains. 0.4% w/v of L-arabinose (Goldbio) and antibiotics were added when appropriate at the following concentrations: chloramphenicol 20 µg/ml (Cam), kanamycin (Kan) 25 µg/ml, tetracycline (Tet) 10 µg/ml, ampicillin (Amp) 125 µg/mL.

Strains with pTrc99a derived plasmids were grown without IPTG. For *nadA::Tn10* and *nadB::Tn10* strains containing pZS21::Strep-BamA, media was supplemented with 2ng/ml anhydrotetracycline, (aTc) (Alfa Aesar) to derepress BamA expression.

Growth curve analysis was performed by growing 1 ml cultures in 24-well plates with Breathe-Easy® sealing membrane (Sigma-Aldrich) at 37 °C with orbital shaking. The OD600 was monitored using BioTek Synergy H1 plate reader. All growth curves were performed in at least three independent biological replicates.

### **Cloning, expression, and purification of individual proteins.**

Genes encoding tagged (His6 or Strep) versions of BamE and BamD without lipid modification were amplified using primers listed in Table S4 and Q5 high fidelity DNA polymerase. Gene products were cloned into the pET15b using standard molecular biology techniques, transformed into the *E. coli* Mach1 strain. Sequencing-confirmed clones were transformed in BL21(DE3) cells. Proteins were expressed by growing transformed bacteria in LB broth supplemented with 125 µg/mL of ampicillin at 37 °C. When the OD600nm of the culture reached 0.5, IPTG was added to a final concentration of 1 mM, and cultures were incubated for another 4 hours to allow expression. Cells were harvested by centrifugation, washed, and disrupted by Avestin Emulsiflex C3 at 30 psi in buffer A (25 mM Tris–HCl pH 8.0, 150 mM NaCl, 0.1mM PMSF, and 1x Protease Inhibitor Cocktail, 0.1 mg/mL lysozyme), and clarified by centrifugation at 15000g for 30 min at 4 C, and subjected to affinity chromatography using ÄKTA Pure 25 system (GE Healthcare Life Sciences).

For BamE-Strep and BamD-Strep purification, clarified supernatants were loaded onto StrepTrap™ HP column (GE Healthcare Life Sciences) pre-equilibrated in buffer B (25 mM Tris–HCl pH 8.0, 150 mM NaCl). The column was washed with buffer B, and bound proteins were eluted with buffer B containing 5 mM desthiobiotin.

For BamE-His purification, clarified supernatant was loaded onto HisTrap™ FF column (GE Healthcare Life Sciences) pre-equilibrated in buffer B (25 mM Tris–HCl pH 8.0, 150 mM NaCl). The column was washed with buffer B, and bound proteins were eluted with buffer B containing 250 mM imidazole.

Purification and refolding of His-BamA were described previously (Tata *et al.*, 2021).

After purification, all proteins were dialyzed in buffer B (25 mM Tris–HCl pH 8.0, 150 mM NaCl), and analyzed by 15% SDS polyacrylamide gel (SDS-PAGE).

### ***In silico* analysis:**

All the protein sequences of BamA, BamD, and BamE of different bacterial species were retrieved from NCBI, and multiple sequence alignment of POTRA5 domain of BamA, BamD, and BamE of different bacterial species was done by using Clustal Omega (Sievers *et al.*, 2011).

ColabFold(Mirdita *et al.*, 2022) was used to predict the protein complexes of the corresponding protein pairs and mutant analysis. Amino acid sequences of the BamE, BamA or BamD proteins devoid of their signal sequence and the lipid-modified cysteine residue were analyzed using default settings (“protein structure prediction using "AlphaFold2-ptm" and complex prediction "AlphaFold-multimer-v2". For complexes "AlphaFold-multimer-v[1,2]" and "AlphaFold-ptm" can be used”) at the Google Collab interface. Top scoring high confidence PDB generated from ColabFold server was used for interacting interfaces analysis using the PDBePISA (Krissinel & Henrick, 2007).

### **SUPPLEMENTAL REFERENCES**

- Amann, E., Ochs, B., and Abel, K.J. (1988) Tightly regulated tac promoter vectors useful for the expression of unfused and fused proteins in *Escherichia coli*. *Gene* **69**: 301-315.
- Bakelar, J., Buchanan, S.K., and Noinaj, N. (2016) The structure of the beta-barrel assembly machinery complex. *Science* **351**: 180-186.
- Gu, Y., Li, H., Dong, H., Zeng, Y., Zhang, Z., Paterson, N.G., Stansfeld, P.J., Wang, Z., Zhang, Y., Wang, W., and Dong, C. (2016) Structural basis of outer membrane protein insertion by the BAM complex. *Nature* **531**: 64-69.
- Krissinel, E., and Henrick, K. (2007) Inference of macromolecular assemblies from crystalline state. *J Mol Biol* **372**: 774-797.
- Lutz, R., and Bujard, H. (1997) Independent and tight regulation of transcriptional units in *Escherichia coli* via LacR/O, the TetR/O and AraC/I1-2 regulatory elements. *Nucl. Acids. Res.* **25**: 1203-1210.
- Malinverni, J.C., Werner, J., Kim, S., Sklar, J.G., Kahne, D., Misra, R., and Silhavy, T.J. (2006) YfiO stabilizes the YaeT complex and is essential for outer membrane protein assembly in *Escherichia coli*. *Mol Microbiol* **61**: 151-164.
- Mirdita, M., Schutze, K., Moriwaki, Y., Heo, L., Ovchinnikov, S., and Steinegger, M. (2022) ColabFold: making protein folding accessible to all. *Nat Methods* **19**: 679-682.
- Sievers, F., Wilm, A., Dineen, D., Gibson, T.J., Karplus, K., Li, W., Lopez, R., McWilliam, H., Remmert, M., Soding, J., Thompson, J.D., and Higgins, D.G. (2011) Fast, scalable generation of high-quality protein multiple sequence alignments using Clustal Omega. *Mol Syst Biol* **7**: 539.
- Tata, M., and Konovalova, A. (2019) Improper Coordination of BamA and BamD Results in Bam Complex Jamming by a Lipoprotein Substrate. *mBio* **10**.
- Tata, M., Kumar, S., Lach, S.R., Saha, S., Hart, E.M., and Konovalova, A. (2021) High-throughput suppressor screen demonstrates that RcsF monitors outer membrane integrity and not Bam complex function. *Proceedings of the National Academy of Sciences of the United States of America* **118**.
- Wu, T., Malinverni, J., Ruiz, N., Kim, S., Silhavy, T.J., and Kahne, D. (2005) Identification of a multicomponent complex required for outer membrane biogenesis in *Escherichia coli*. *Cell* **121**: 235-245.
